# Supplementary material
Source: MDPI journal article supplement (https://www.mdpi.com/2079-6412/14/1/17)
Supplement: s1 [file s1]

# Improvement of the Electrocatalytic Properties for the Methanol Oxidation Reaction (MOR) of the CoPt Alloy

Oana-Georgiana Dragos-Pinzaru <sup>1</sup>, Luiza Racila <sup>1,\*</sup>, Gabriela Buema <sup>1</sup>, Ibro Tabakovic <sup>2</sup> and Nicoleta Lupu <sup>1</sup>

<sup>1</sup> National Institute of R&D for Technical Physics, 700050 Iasi, Romania; odragos@phys-iasi.ro (O.-G.D.-P.); gbuema@phys-iasi.ro (G.B.); nicole@phys-iasi.ro (N.L.)

<sup>2</sup> ECE Department, University of Minnesota, Minneapolis, MN 55435, USA; tabakovicibro@gmail.com

\* Correspondence: lbudeanu@phys-iasi.ro

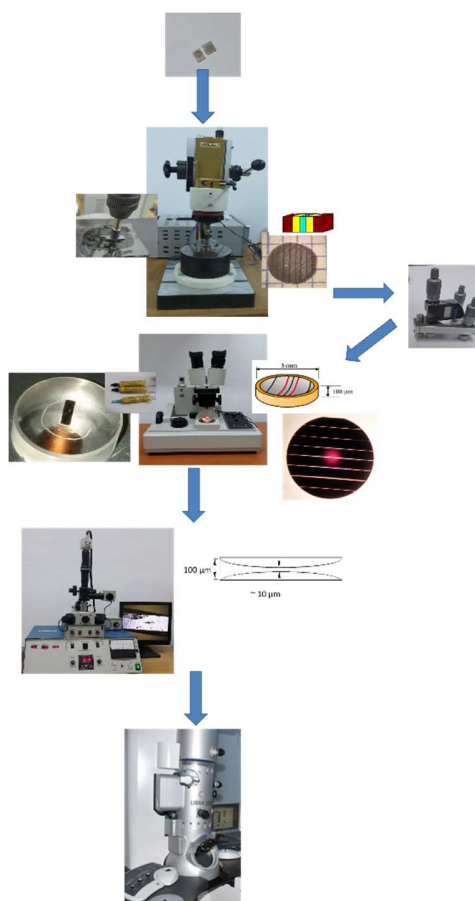

**Figure S1.** Schematic diagram of the TEM sample preparation
